# Supplementary material
Source: publisher site journal article supplement (https://www.spandidos-publications.com/2834/downloadSupplementary)

Figure S1. Effect of OE-TWIST1 on linc-ROR knockdown mediated-effects on DOX sensitivity. (A) starBase was used to analyze linc-ROR expression in 374 cancer and 50 healthysamples in LIHC. (B) In total, two HCC cell lines were randomly selected and the cell viability following transfection with linc-ROR siRNA and OE-TWIST1, and treatment with 0, 0.3125, 0.625, 1.25, 2.5 or 5  $\mu\text{g/ml}$  DOX. \*\* $P<0.01$  and \*\*\* $P<0.001$  vs. lin-ROR siRNA. (C) Effect of OE-TWIST1 and linc-ROR siRNA co-transfection on E-cadherin and vimentin protein expression levels. (D) Transfection efficiency of OE-TWIST1. \*\*\* $P<0.001$  vs. vector. TWIST1, twist family bHLH transcription factor 1; linc-ROR, long intergenic non-protein coding RNA-regulator of reprogramming; DOX, doxorubicin; LIHC, liver hepatocellular carcinoma; HCC, hepatocellular carcinoma; siRNA, small interfering RNA; OE, overexpression; ACTB,  $\beta$ -actin.

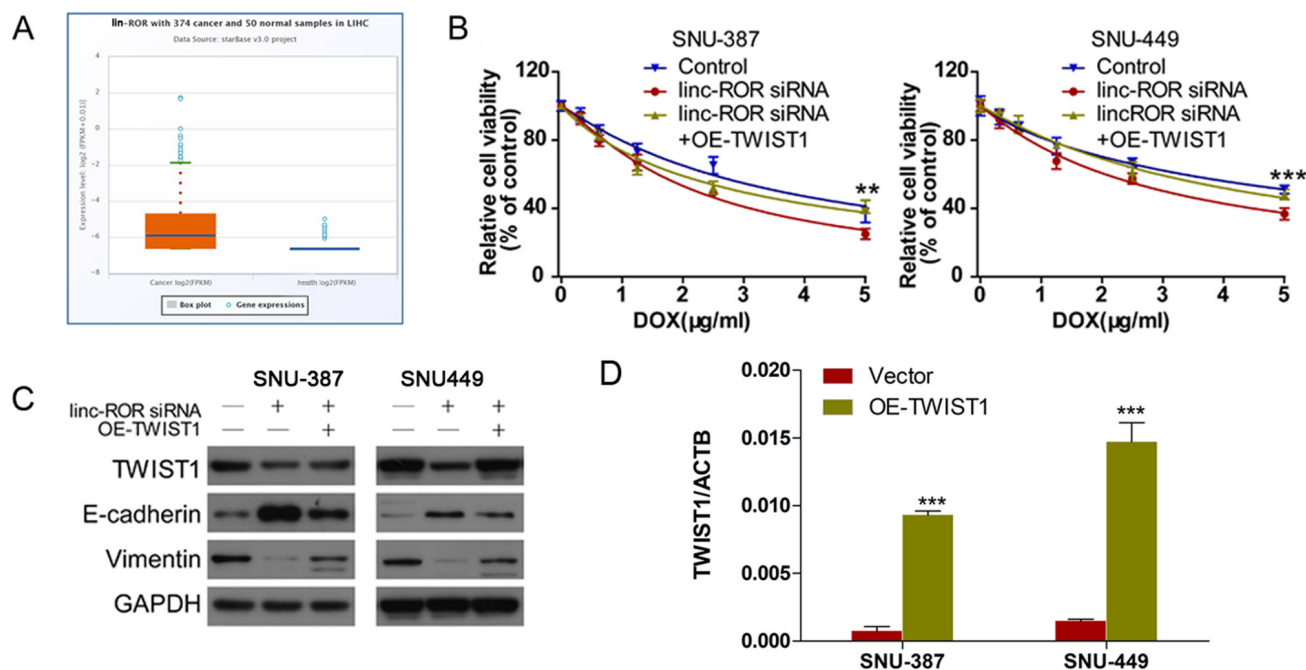

Supplement: Supplementary file 1 [file downloadSupplementary]
